# Supplementary material for: Computational prediction and experimental validation of low-affinity target of triptolide and its analogues
Source: Royal Society of Chemistry journal article supplement (doi:10.1039/c4ra17009a), 2015-01-01
Supplement: c4ra17009a1.pdf [file c4ra17009a1.pdf]

## Electronic Supplementary Information

### Computational prediction and experimental validation of low-affinity target of triptolide and its analogues

*Xiufeng Liu<sup>a</sup>, Kai Wang<sup>a</sup>, Ningjun Duan<sup>a</sup>, Yan Lan<sup>a</sup>, Pengcheng Ma<sup>b</sup>, Heng Zheng<sup>d</sup>, Weijuan Zheng<sup>a,\*</sup>, Jiahuang Li<sup>a,\*</sup>, and Zi-chun Hua<sup>a,c\*</sup>*

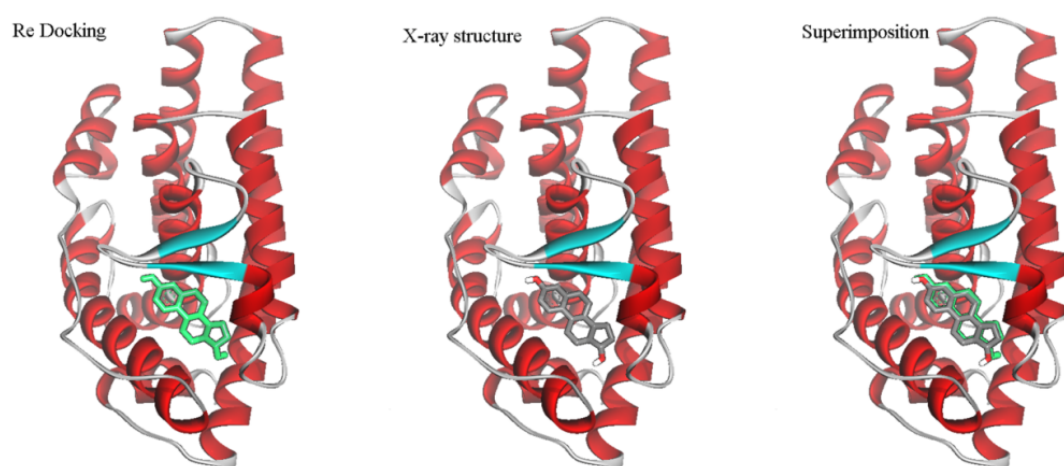

**Figure S1.** Comparison of autodock poses and X-ray crystallographic pose for estradiol in ER $\alpha$ -LBD. Crystallographic pose is in grey with the redocked pose in green.

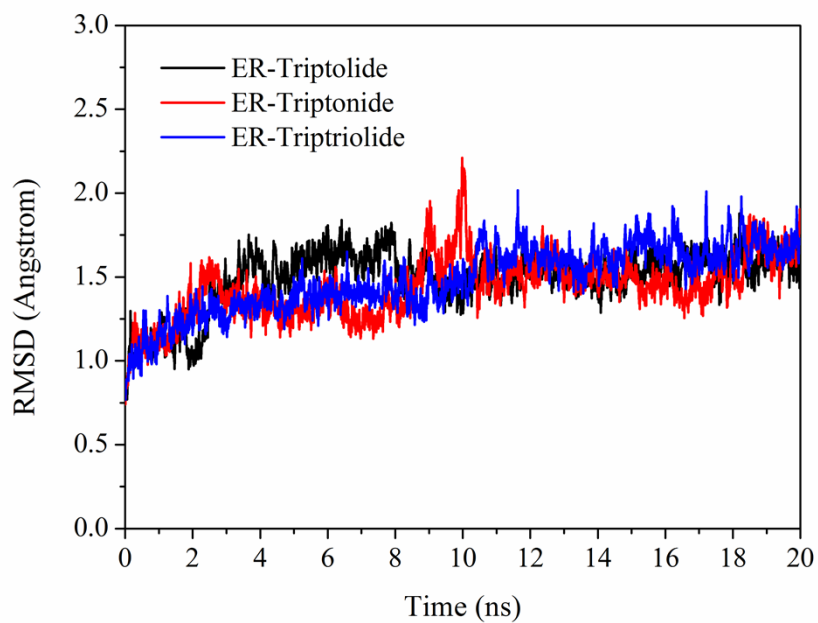

**Figure S2.** The results of molecular dynamics (MD) simulation. The MD simulation time vs. root mean-square deviation (RMSD) of the backbone atoms for ER $\alpha$ -triptolide complex system (black), ER $\alpha$ -triptonide complex system (red) and ER $\alpha$ -triptriolide complex system (blue).

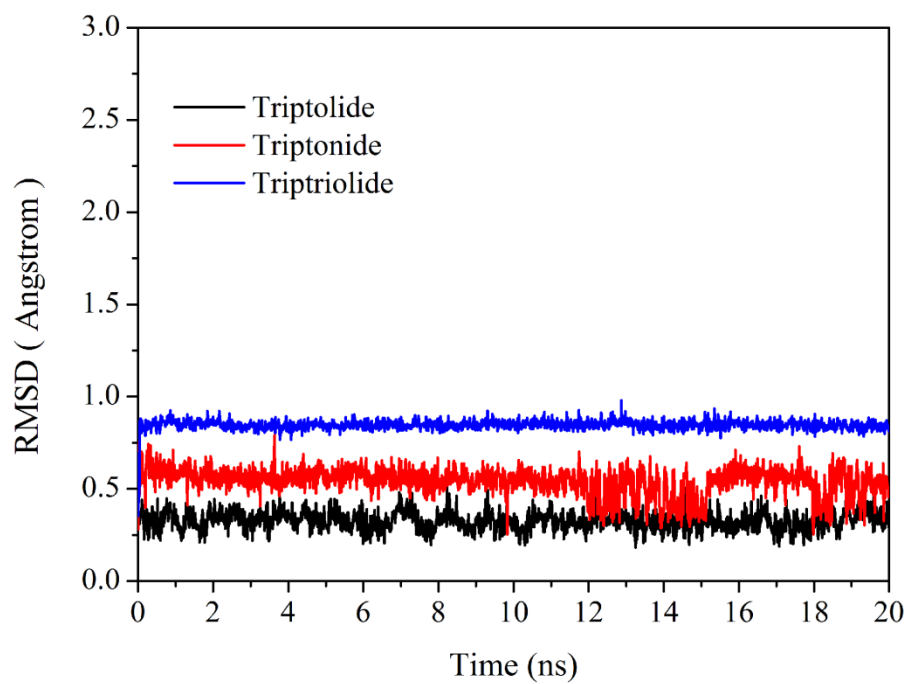

**Figure S3.** The results of molecular dynamics (MD) simulations. The RMSD values of triptolide (black), triptonide (red) and triptriolide (blue) from protein-ligand complexes during 20 ns of MD simulation period.
